# Supplementary material for: Selenium biofortification of soybean genotypes in a tropical soil via Se-enriched phosphate fertilizers
Source: Front Plant Sci. 2022 Sep 14;13:988140. doi: 10.3389/fpls.2022.988140 (PMC9517938; doi:10.3389/fpls.2022.988140)
Supplement: Supplementary file 2 [file Data_Sheet_2.xlsx]

## Sheet: Plan1
Source	Genotype	Block	Protein_first_season	Protein_second_season
MAP	M5917	1	41.6058	40.4796
MAP	M5917	2	41.4071	42.3346
MAP	M5917	3	40.4133	22.3929
MAP	M5917	4	42.5334	29.6806
MAP	TMG7061	1	28.1357	40.8108
MAP	TMG7061	2	28.9309	39.8833
MAP	TMG7061	3	29.1013	42.2683
MAP	TMG7061	4	29.1013	41.5396
MAP	N5909	1	29.3285	38.5583
MAP	N5909	2	29.6125	41.0758
MAP	N5909	3	28.7037	40.8108
MAP	N5909	4	29.6125	41.0758
MAP	LANÇA	1	36.9562	39.6183
MAP	LANÇA	2	36.1875	40.2808
MAP	LANÇA	3	38.2687	40.9433
MAP	LANÇA	4	36.4286	40.8108
MAPSELENIO	M5917	1	31.6573	41.0758
MAPSELENIO	M5917	2	30.5781	38.8233
MAPSELENIO	M5917	3	30.7625	40.9433
MAPSELENIO	M5917	4	30.0669	39.6845
MAPSELENIO	TMG7061	1	29.3285	40.8771
MAPSELENIO	TMG7061	2	28.7037	42.0033
MAPSELENIO	TMG7061	3	27.7381	40.0158
MAPSELENIO	TMG7061	4	28.9309	39.2208
MAPSELENIO	N5909	1	29.3853	41.0096
MAPSELENIO	N5909	2	28.7037	40.1483
MAPSELENIO	N5909	3	29.4421	42.2021
MAPSELENIO	N5909	4	29.5557	41.4733
MAPSELENIO	LANÇA	1	30.3509	39.552
MAPSELENIO	LANÇA	2	30.4077	38.227
MAPSELENIO	LANÇA	3	30.1805	41.0096
MAPSELENIO	LANÇA	4	30.8053	40.9433
PHOS	M5917	1	30.8621	40.4133
PHOS	M5917	2	31.4869	41.2746
PHOS	M5917	3	31.4301	40.5458
PHOS	M5917	4	30.2373	41.4071
PHOS	TMG7061	1	29.3285	41.4733
PHOS	TMG7061	2	29.5557	32.7944
PHOS	TMG7061	3	29.3285	39.4858
PHOS	TMG7061	4	29.4989	40.8771
PHOS	N5909	1	28.4197	39.2208
PHOS	N5909	2	29.6693	41.2746
PHOS	N5909	3	29.9533	41.8046
PHOS	N5909	4	29.3853	40.4133
PHOS	LANÇA	1	30.3509	41.2746
PHOS	LANÇA	2	31.8277	39.9495
PHOS	LANÇA	3	31.3165	42.4671
PHOS	LANÇA	4	30.3509	40.2146
PHOSSELENIO	M5917	1	31.9981	39.1545
PHOSSELENIO	M5917	2	30.8621	42.4008
PHOSSELENIO	M5917	3	31.3165	41.2083
PHOSSELENIO	M5917	4	30.6917	42.8646
PHOSSELENIO	TMG7061	1	30.1805	40.0821
PHOSSELENIO	TMG7061	2	30.1805	39.022
PHOSSELENIO	TMG7061	3	28.9877	39.8833
PHOSSELENIO	TMG7061	4	29.2717	39.4195
PHOSSELENIO	N5909	1	29.3285	39.6183
PHOSSELENIO	N5909	2	30.1805	38.2933
PHOSSELENIO	N5909	3	29.0445	39.7508
PHOSSELENIO	N5909	4	29.3285	39.817
PHOSSELENIO	LANÇA	1	30.4645	40.8771
PHOSSELENIO	LANÇA	2	30.8621	40.4796
PHOSSELENIO	LANÇA	3	31.0893	42.8646
PHOSSELENIO	LANÇA	4	31.0893	39.8833

## Sheet: Planilha1
Source	Genotype	Block	Protein_first_season	Protein_second_season
C-MAP	M5917	1	41.6058	40.4796
C-MAP	M5917	2	41.4071	42.3346
C-MAP	M5917	3	40.4133	22.3929
C-MAP	M5917	4	42.5334	29.6806
C-MAP	TMG7061	1	28.1357	40.8108
C-MAP	TMG7061	2	28.9309	39.8833
C-MAP	TMG7061	3	29.1013	42.2683
C-MAP	TMG7061	4	29.1013	41.5396
C-MAP	N5909	1	29.3285	38.5583
C-MAP	N5909	2	29.6125	41.0758
C-MAP	N5909	3	28.7037	40.8108
C-MAP	N5909	4	29.6125	41.0758
C-MAP	LANÇA	1	36.9562	39.6183
C-MAP	LANÇA	2	36.1875	40.2808
C-MAP	LANÇA	3	38.2687	40.9433
C-MAP	LANÇA	4	36.4286	40.8108
C-MAP_Se	M5917	1	31.6573	41.0758
C-MAP_Se	M5917	2	30.5781	38.8233
C-MAP_Se	M5917	3	30.7625	40.9433
C-MAP_Se	M5917	4	30.0669	39.6845
C-MAP_Se	TMG7061	1	29.3285	40.8771
C-MAP_Se	TMG7061	2	28.7037	42.0033
C-MAP_Se	TMG7061	3	27.7381	40.0158
C-MAP_Se	TMG7061	4	28.9309	39.2208
C-MAP_Se	N5909	1	29.3853	41.0096
C-MAP_Se	N5909	2	28.7037	40.1483
C-MAP_Se	N5909	3	29.4421	42.2021
C-MAP_Se	N5909	4	29.5557	41.4733
C-MAP_Se	LANÇA	1	30.3509	39.552
C-MAP_Se	LANÇA	2	30.4077	38.227
C-MAP_Se	LANÇA	3	30.1805	41.0096
C-MAP_Se	LANÇA	4	30.8053	40.9433
E-MAP	M5917	1	30.8621	40.4133
E-MAP	M5917	2	31.4869	41.2746
E-MAP	M5917	3	31.4301	40.5458
E-MAP	M5917	4	30.2373	41.4071
E-MAP	TMG7061	1	29.3285	41.4733
E-MAP	TMG7061	2	29.5557	32.7944
E-MAP	TMG7061	3	29.3285	39.4858
E-MAP	TMG7061	4	29.4989	40.8771
E-MAP	N5909	1	28.4197	39.2208
E-MAP	N5909	2	29.6693	41.2746
E-MAP	N5909	3	29.9533	41.8046
E-MAP	N5909	4	29.3853	40.4133
E-MAP	LANÇA	1	30.3509	41.2746
E-MAP	LANÇA	2	31.8277	39.9495
E-MAP	LANÇA	3	31.3165	42.4671
E-MAP	LANÇA	4	30.3509	40.2146
E-MAP_Se	M5917	1	31.9981	39.1545
E-MAP_Se	M5917	2	30.8621	42.4008
E-MAP_Se	M5917	3	31.3165	41.2083
E-MAP_Se	M5917	4	30.6917	42.8646
E-MAP_Se	TMG7061	1	30.1805	40.0821
E-MAP_Se	TMG7061	2	30.1805	39.022
E-MAP_Se	TMG7061	3	28.9877	39.8833
E-MAP_Se	TMG7061	4	29.2717	39.4195
E-MAP_Se	N5909	1	29.3285	39.6183
E-MAP_Se	N5909	2	30.1805	38.2933
E-MAP_Se	N5909	3	29.0445	39.7508
E-MAP_Se	N5909	4	29.3285	39.817
E-MAP_Se	LANÇA	1	30.4645	40.8771
E-MAP_Se	LANÇA	2	30.8621	40.4796
E-MAP_Se	LANÇA	3	31.0893	42.8646
E-MAP_Se	LANÇA	4	31.0893	39.8833
